# Supplementary material for: Spatial memory in Alzheimer’s disease 5XFAD mice is enhanced by XPO1 inhibitor KPT-330
Source: PubMed Central journal article supplement — bioRxiv. 2024 Oct 22:2024.10.21.619493. Preprint. [Version 1] doi: 10.1101/2024.10.21.619493 (PMC11527021; doi:10.1101/2024.10.21.619493), 2024-10-22
Supplement: media-1.pdf [file media-1.pdf]

Figure S1.

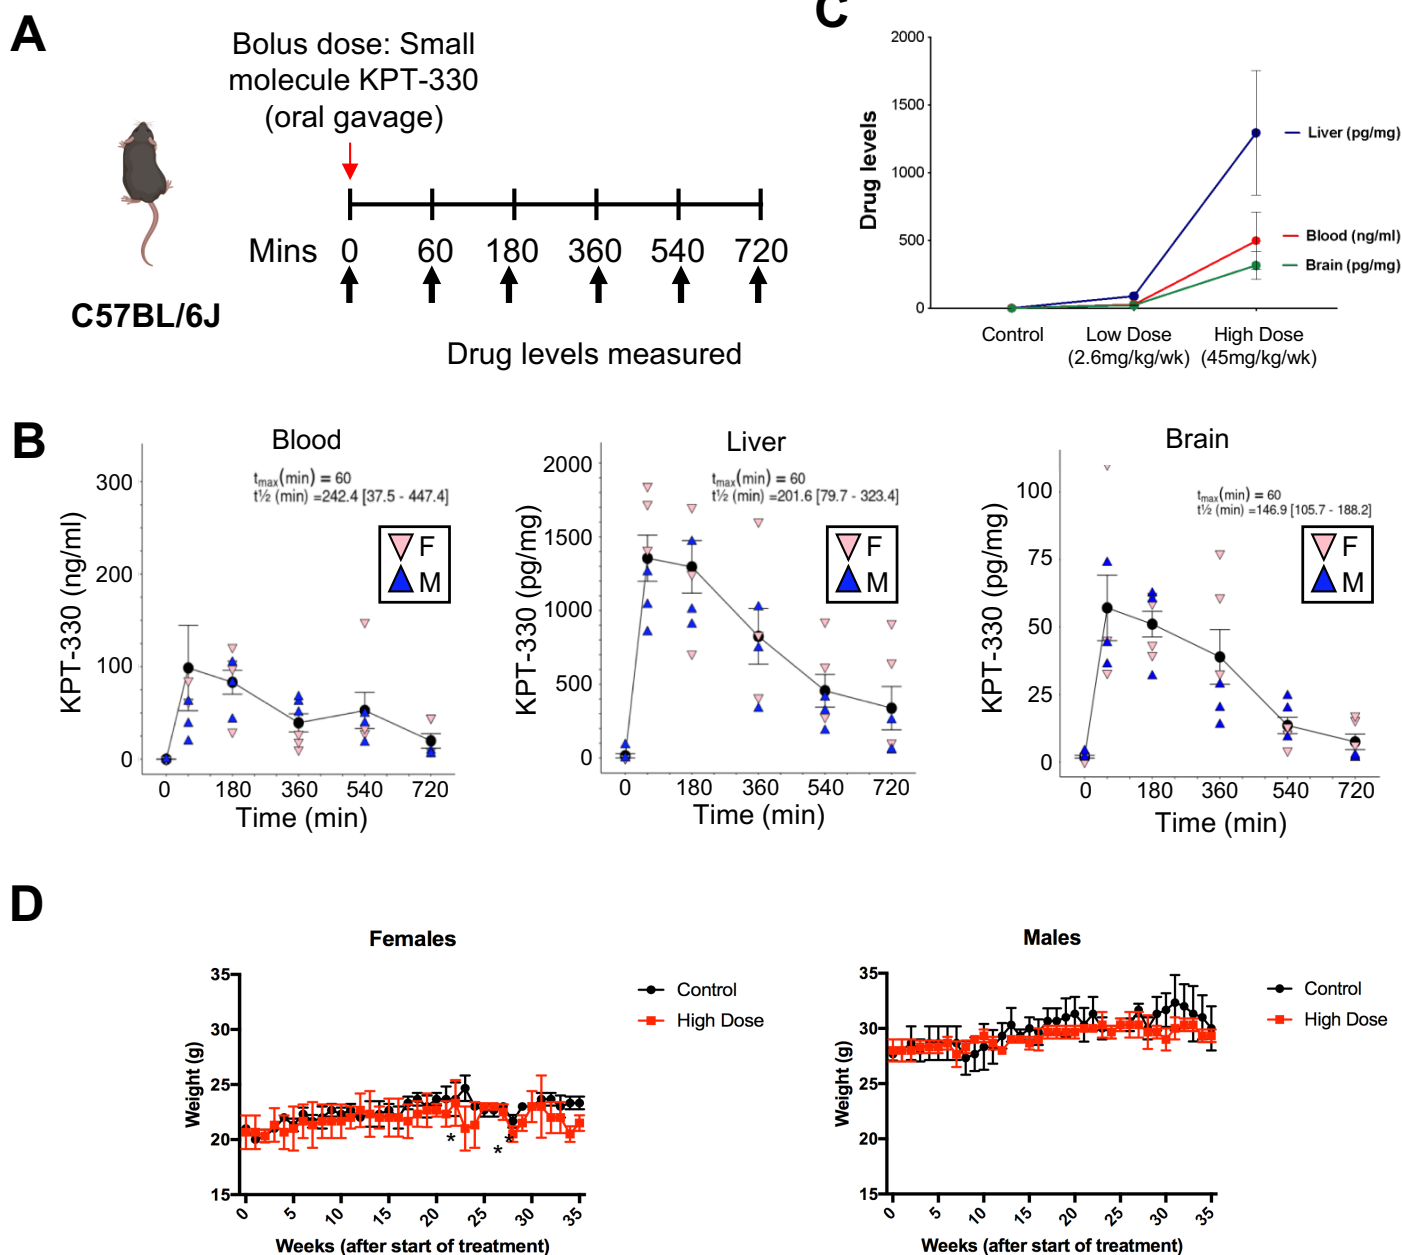

**Figure S1. Pharmacological and bioaccumulation analysis of KPT-330.** **A.** C57/B6 mice received a bolus dose of 7.5mg/kg KPT-330 (p.o.) and were then sacrificed at 60, 180, 360, 540, and 720 min post administration. **B.** Blood, liver and brain were collected and assessed for KPT-330 concentration in each mouse. At each time point, 4-month old male (n=3) and female (n=3) mice were included. **C.** Blood, liver, and brain levels of KPT-330 were also analyzed in 4-month old mice fed chow, or chow with low or high dose of KPT-330 for two weeks. **D.** Mice weight was measured for the duration of the treatment (45mg/kg/wk) from 4-months to 12 months of age (n=3 per sex per treatment) \*:  $P < 0.05$ ,  $t$ -test.

Figure S2.

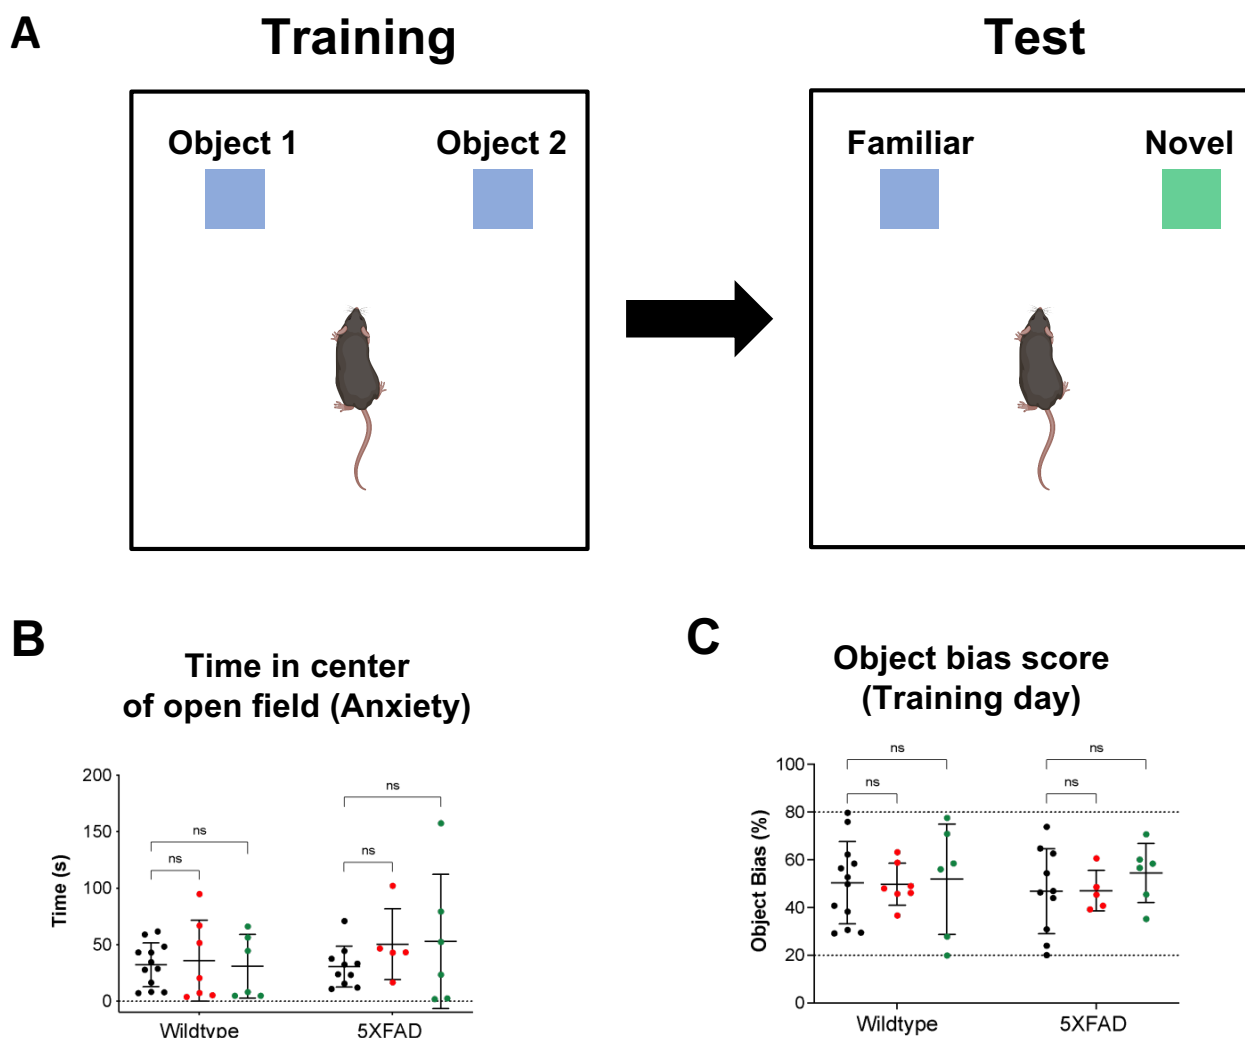

**Figure S2. KPT-330 treatment does not improve novel object recognition (NOR) in 5XFAD mice. A.** Four-month old wildtype and 5XFAD mice were fed with either chow or chow containing high (45 mg/kg/wk) or low (2.6 mg/kg/wk) dose of the XPO1 inhibitor, KPT-330, for 2 months and assessed for effects on recognition memory using the NOR test at 6 months of age following prior habituation to the test arena and object familiarization (see methods for details). **B.** Time in center of open field and **C.** object bias score during training day were measured. ns: not significant, n=6-12, ANOVA.

Figure S3.

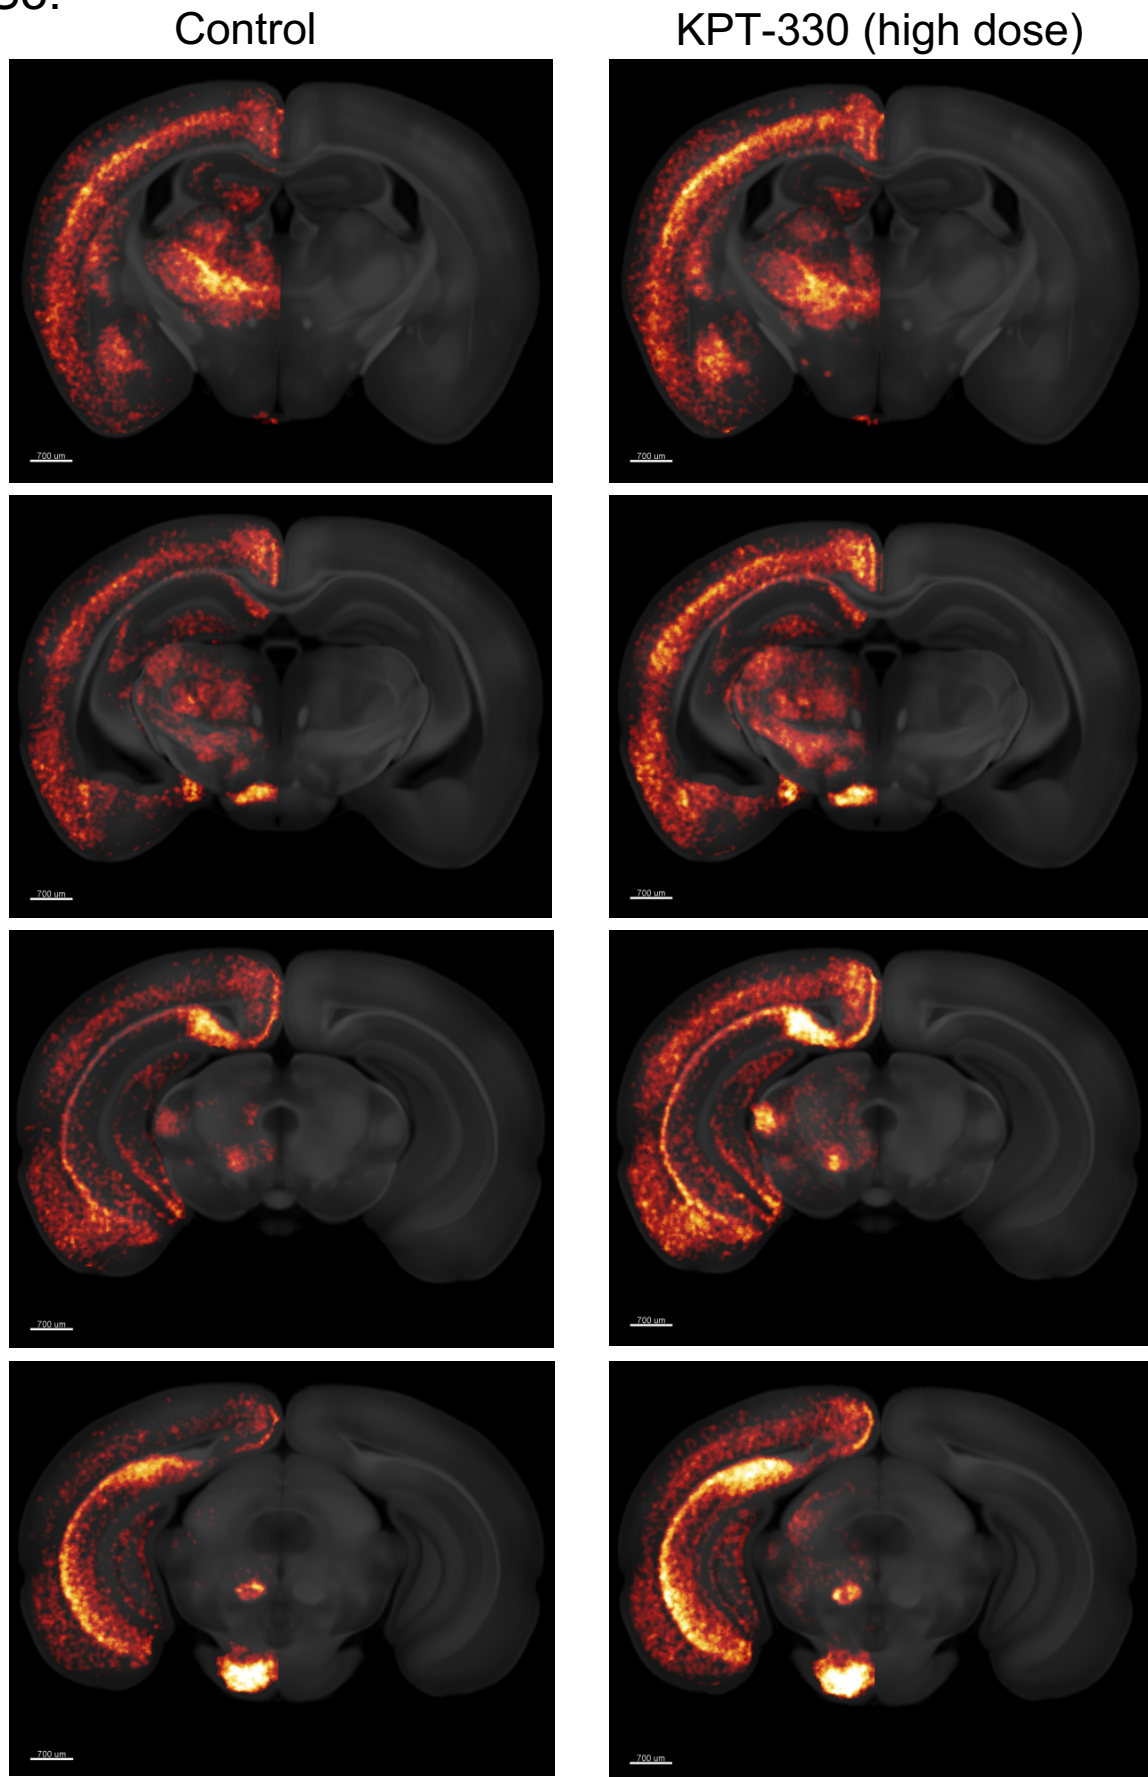

2D planes from average maps

**Figure S3. Differential amyloid accumulation in 5XFAD mice brains.** Representative 2D images at selected coronal planes showing group average of plaque volume in response to KPT-330 treatment and with control shown in glow scale. Scale bar 700  $\mu$ m.

Figure S4.

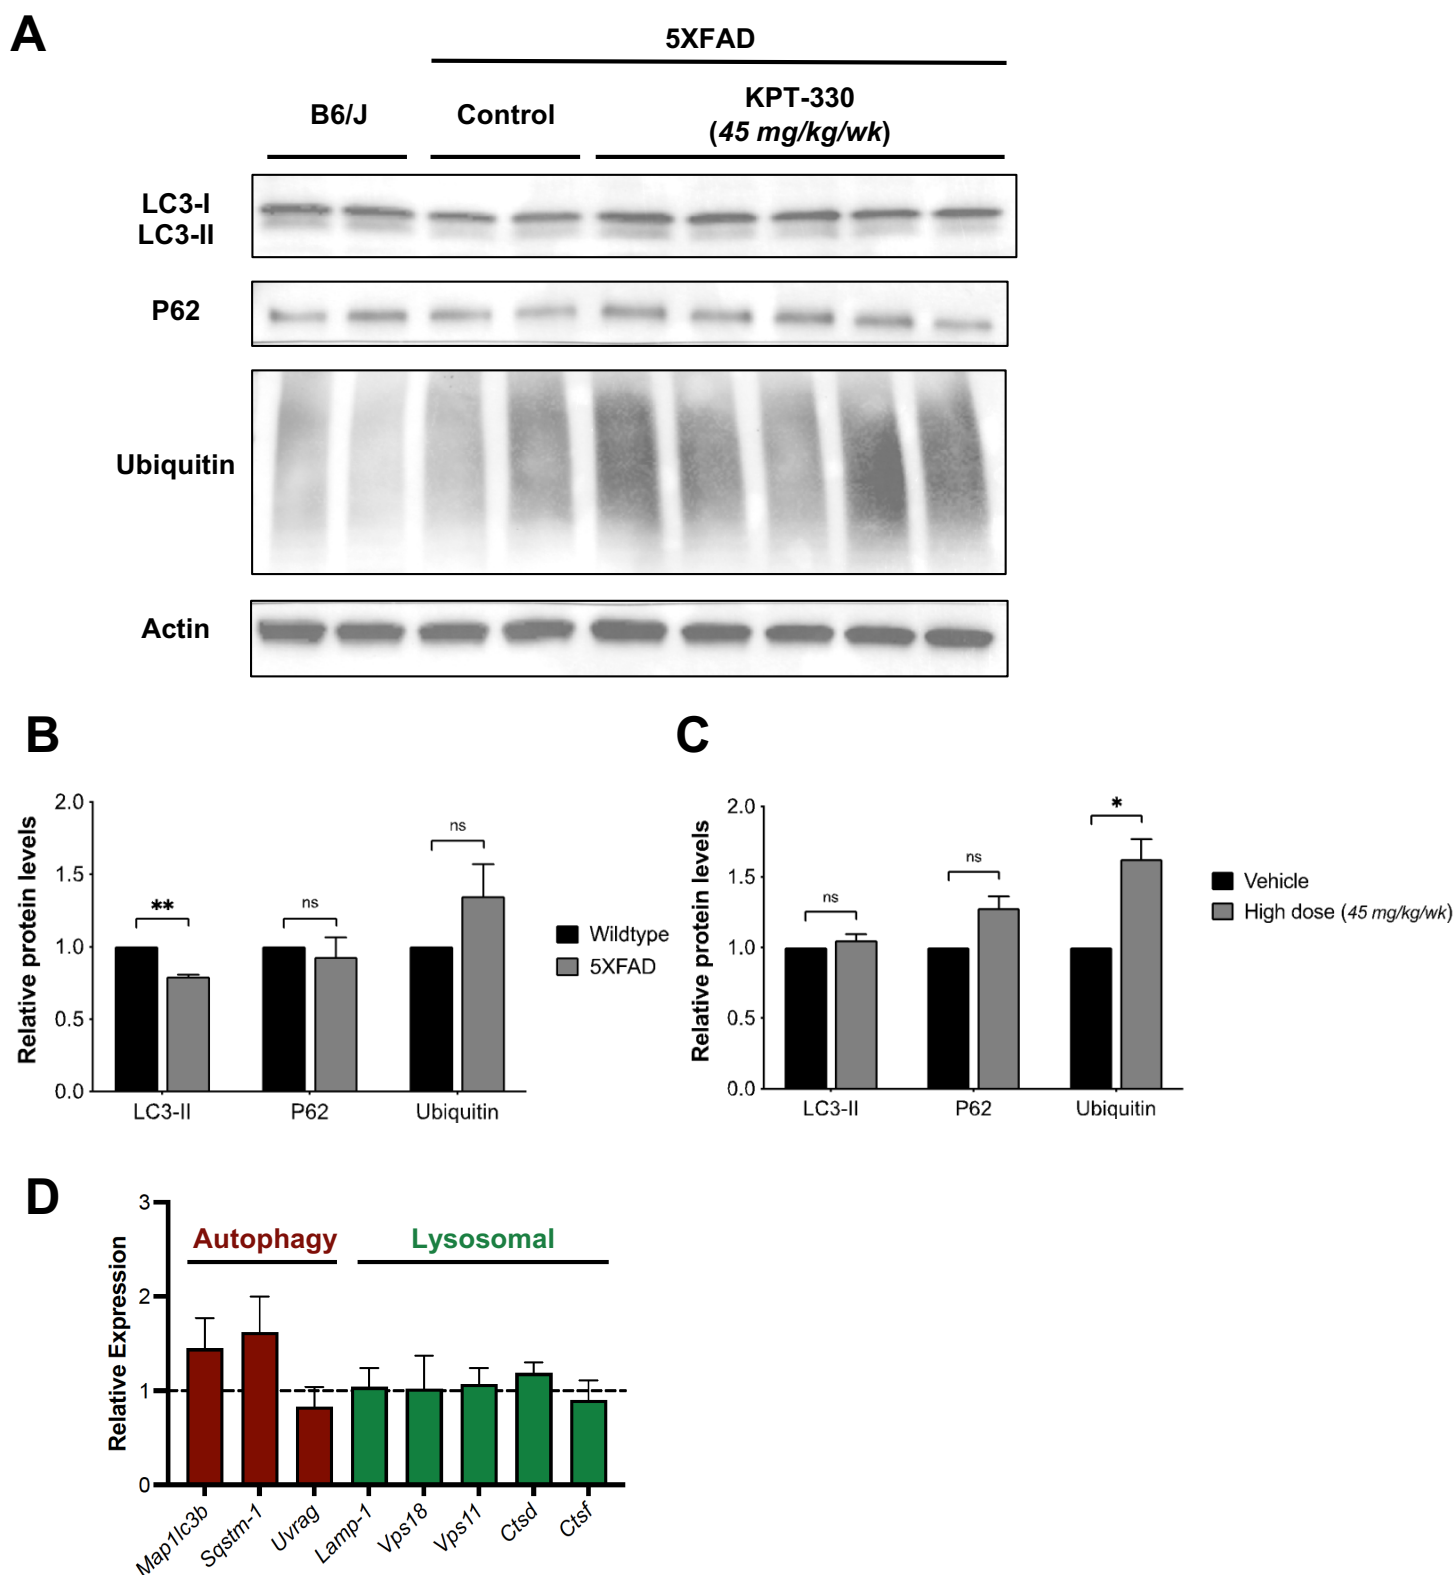

**Figure S4. Protein analysis in brains of 5XFAD mice. A.** Immunoblotting of LC3, p62 (SQSTM1) and ubiquitin in brains of 9-months old B6/J and transgenic 5XFAD mice (with or without KPT-330 from 4 months of age). **B.** Relative protein levels was compared between B6/J (wild-type) and 5XFAD (**B**) and between control (vehicle) and high dose KPT-330 (**C**). Values expressed as mean of  $n = 2 \pm \text{SEM}$ ; \*:  $P < 0.05$ , \*\*:  $P < 0.01$ . **D.** mRNA levels of autophagy and lysosomal genes in the brain of 9-month old 5XFAD animals and treated with KPT-330 compared to control (normalized at 1),  $n=3$ ,  $t$ -test.

Table S1.

| Gene name               | Sequence 5' -3'            |
|-------------------------|----------------------------|
| <i>Gapdh</i> Forward    | CATCACTGCCACCCAGAAGACTG    |
| <i>Gapdh</i> Reverse    | ATGCCAGTGAGCTTCCCCTTCAG    |
| <i>Actb</i> Forward     | GTGACGTTGACATCCGTAAAGA     |
| <i>Actb</i> Reverse     | GCCGGACTCATCGTACTCC        |
| <i>B2m</i> Forward      | ACCCGCCTCACATTGAAATCC      |
| <i>B2m</i> Reverse      | GGCGTATGTATCAGTCTCAGTG     |
| <i>Map11c3b</i> Forward | CGGACTGAGACACACAAGG        |
| <i>Map11c3b</i> Reverse | TCGCTCTATAATCACTGGGATCT    |
| <i>Sqstm1</i> Forward   | GGCCTATCTTCTGGGCAAGG       |
| <i>Sqstm1</i> Reverse   | CCGGCACTCCTTCTTCTCTTT      |
| <i>Uvrag</i> Forward    | ATCCGACGTGGAGGAGTCTT       |
| <i>Uvrag</i> Reverse    | TGCGTTTGGATGACCCTTGT       |
| <i>Lamp 1</i> Forward   | TGCTCCGGGATGCCACTAT        |
| <i>Lamp 1</i> Reverse   | CTTGTTGTCCTTTTTTCAGGTAGGTG |
| <i>Vps18</i> Forward    | CGCCTGCGTCCATGTCTATAA      |
| <i>Vps18</i> Reverse    | GGCAGCACATCCTCGATCTT       |
| <i>Vps11</i> Forward    | CTGGAAAAGAGAGACGGTGGCAATC  |
| <i>Vps11</i> Reverse    | GAAAGGCCAGCCCAGTAACG       |
| <i>Ctsd</i> Forward     | CTGTGGGTCCCCTCCATTCATTG    |
| <i>Ctsd</i> Reverse     | GGTAGCCCATGCCCAAGATG       |
| <i>Ctsf</i> Forward     | CACAGCTCAGTATGGGATCACC     |
| <i>Ctsf</i> Reverse     | TTGGCTGGACTCATCTTCTGTC     |

Table S1. Primer used in the study

Data S1.

See Excel File

Video S1.

See Video File

Video S2.

See Video File
